# Supplementary material for: One step C–N bond formation from alkylbenzene and ammonia over Cu-modified TS-1 zeolite catalyst
Source: Royal Society of Chemistry journal article supplement (doi:10.1039/c4cy00472h), 2014-01-01
Supplement: c4cy00472h1.pdf [file c4cy00472h1.pdf]

# **One step C–N bond formation from alkylbenzene and ammonia over Cu-modified TS-1 zeolite catalyst†**

**Sheng Xia, Tianhua Yu, Huihui Liu, Guiying Li\*, Changwei Hu\***

*Key Laboratory of Green Chemistry and Technology, Ministry of Education, College of*

*Chemistry, Sichuan University, Chengdu, Sichuan, 610064, China*

## **Electronic Supplementary Information (ESI)**

### **Contents**

**Table S1: The o-, m-, p- substitution of the ring products from toluene (The effect of the different Cu contents).**

**Table S2: The o-, m-, p- substitution of the ring products from toluene (The effect of amount of catalysts).**

**Table S3: The o-, m-, p- substitution of the ring products from toluene (The effect of temperature).**

**Table S4: The o-, m-, p- substitution of the ring products from toluene (The effect of H<sub>2</sub>O<sub>2</sub> dosage).**

**Table S5: The o-, m-, p- substitution of the ring products from toluene (The effect of ammonia dosage).**

**Table S6: The o-, m-, p- substitution of the ring products from toluene (The effect of H<sub>2</sub>O).**

**Table S1** The effect of Cu content on the catalytic reaction of toluene.<sup>a</sup>

| Samples    | Molar Yield (%) |     |     |         |     |     |              |     |     |
|------------|-----------------|-----|-----|---------|-----|-----|--------------|-----|-----|
|            | Toluidine       |     |     | Cresols |     |     | Nitrobenzene |     |     |
|            | o-              | m-  | p-  | o-      | m-  | p-  | o-           | m-  | p-  |
| TS-1       | 1.3             | 0.4 | 0.2 | 0.9     | 0.4 | 0.2 | 0.4          | 0.1 | --  |
| 1.5Cu/TS-1 | 1.8             | 0.5 | 0.3 | 0.7     | 0.4 | 0.2 | 0.2          | --  | --  |
| 2.0Cu/TS-1 | 2.0             | 0.6 | 0.3 | 1.7     | 0.6 | 0.3 | 0.5          | 0.3 | 0.1 |
| 2.5Cu/TS-1 | 2.3             | 0.7 | 0.4 | 2.1     | 0.8 | 0.4 | 0.7          | 0.2 | 0.1 |
| 3.0Cu/TS-1 | 2.2             | 0.7 | 0.4 | 1.6     | 0.6 | 0.3 | 0.6          | 0.2 | 0.1 |

<sup>a</sup> Reaction conditions: Catalyst 0.15 g; Toluene 4.7 mmol; NH<sub>3</sub>·H<sub>2</sub>O 87.4 mmol; H<sub>2</sub>O<sub>2</sub> 14.7 mmol; H<sub>2</sub>O 25 mL; 353 K, 365min.

**Table S2** Effect of the amount of catalyst.<sup>a</sup>

| 2.5Cu/TS-1<br>Catalyst (g) | Molar Yield (%) |     |     |         |     |     |              |     |     |
|----------------------------|-----------------|-----|-----|---------|-----|-----|--------------|-----|-----|
|                            | Toluidine       |     |     | Cresols |     |     | Nitrobenzene |     |     |
|                            | o-              | m-  | p-  | o-      | m-  | p-  | o-           | m-  | p-  |
| 0.05                       | 0.3             | 0.1 | --  | 0.2     | 0.1 | --  | 0.1          | --  | --  |
| 0.10                       | 0.9             | 0.4 | 0.1 | 0.7     | 0.5 | 0.3 | 0.2          | --  | --  |
| 0.15                       | 2.3             | 0.7 | 0.4 | 2.1     | 0.8 | 0.4 | 0.7          | 0.2 | 0.1 |
| 0.20                       | 2.0             | 0.8 | 0.4 | 2.0     | 0.7 | 0.3 | 0.5          | 0.2 | 0.1 |
| 0.25                       | 1.7             | 1.0 | 0.3 | 1.9     | 0.6 | 0.3 | 0.5          | 0.2 | 0.1 |

<sup>a</sup> Reaction conditions: 2.5Cu/TS-1; Toluene 4.7 mmol; NH<sub>3</sub>·H<sub>2</sub>O 87.4 mmol; H<sub>2</sub>O<sub>2</sub> 14.7 mmol; H<sub>2</sub>O 25 mL; 353 K, 365min.

**Table S3** Effect of temperature on the catalytic reaction of toluene.<sup>a</sup>

| Temperatur<br><sup>e</sup><br>(K) | Molar Yield (%) |     |     |         |     |     |              |     |     |
|-----------------------------------|-----------------|-----|-----|---------|-----|-----|--------------|-----|-----|
|                                   | Toluidine       |     |     | Cresols |     |     | Nitrobenzene |     |     |
|                                   | o-              | m-  | p-  | o-      | m-  | p-  | o-           | m-  | p-  |
| 333                               | 0.1             | --  | --  | 0.2     | 0.1 | --  | --           | --  | --  |
| 343                               | 1.0             | 0.6 | 0.2 | 0.9     | 0.5 | 0.4 | 0.2          | --  | --  |
| 348                               | 1.5             | 0.7 | 0.3 | 1.9     | 0.6 | 0.3 | 0.5          | 0.2 | 0.1 |
| 353                               | 2.3             | 0.7 | 0.4 | 2.1     | 0.8 | 0.4 | 0.7          | 0.2 | 0.1 |
| 358                               | 2.3             | 0.6 | 0.4 | 2.1     | 0.8 | 0.4 | 0.7          | 0.3 | 0.1 |
| 363                               | 1.3             | 0.6 | 0.3 | 2.7     | 0.7 | 0.4 | 0.8          | 0.4 | 0.2 |
| 373                               | 0.6             | 0.4 | 0.1 | 3.1     | 0.7 | 0.5 | 0.8          | 0.5 | 0.4 |

<sup>a</sup> Reaction conditions: Catalyst Cu/TS-1 0.15 g; Toluene 4.7 mmol; NH<sub>3</sub>·H<sub>2</sub>O 87.4 mmol; H<sub>2</sub>O<sub>2</sub> 14.7 mmol; H<sub>2</sub>O 25 mL, 365min.

**Table S4** Effect of H<sub>2</sub>O<sub>2</sub> dosage on the catalytic reaction of toluene.<sup>a</sup>

| H <sub>2</sub> O <sub>2</sub><br>Dosage<br>(mL) | Molar Yield (%) |     |     |         |     |     |              |     |     |
|-------------------------------------------------|-----------------|-----|-----|---------|-----|-----|--------------|-----|-----|
|                                                 | Toluidine       |     |     | Cresols |     |     | Nitrobenzene |     |     |
|                                                 | o-              | m-  | p-  | o-      | m-  | p-  | o-           | m-  | p-  |
| 0.5 <sup>b</sup>                                | 0.7             | 0.3 | 0.1 | 0.7     | 0.3 | 0.1 | 0.4          | 0.2 | --  |
| 1.0 <sup>b</sup>                                | 1.5             | 0.6 | 0.2 | 1.8     | 0.6 | 0.4 | 0.6          | 0.3 | 0.1 |
| 1.5 <sup>b</sup>                                | 2.3             | 0.7 | 0.4 | 2.1     | 0.8 | 0.4 | 0.7          | 0.2 | 0.1 |
| 2.0 <sup>b</sup>                                | 2.2             | 0.7 | 0.4 | 2.7     | 0.7 | 0.4 | 0.7          | 0.3 | 0.1 |
| 2.5 <sup>b</sup>                                | 1.9             | 0.6 | 0.4 | 2.7     | 0.7 | 0.6 | 0.9          | 0.5 | 0.2 |
| 3.0 <sup>b</sup>                                | 1.3             | 0.5 | 0.3 | 3.0     | 0.9 | 0.5 | 1.0          | 0.7 | 0.3 |

<sup>a</sup> Reaction conditions: Catalyst 2.5Cu/TS-1 0.15 g; Toluene 4.7 mmol; NH<sub>3</sub>·H<sub>2</sub>O 87.4 mmol; H<sub>2</sub>O<sub>2</sub> (4.9 mmol , 9.8 mmol , 14.7 mmol , 19.6 mmol , 24.5 mmol , 29.4 mmol) ; H<sub>2</sub>O 25 mL; 353 K.

<sup>b</sup> The reaction time were 355min, 360min, 365min, 370min, 375min and 380min, respectively.

**Table S5** Effect of NH<sub>3</sub>·H<sub>2</sub>O dosage on catalytic reaction of toluene.<sup>a</sup>

| NH <sub>3</sub> ·H <sub>2</sub> O<br>Dosage<br>(mL) | Molar Yield (%) |     |     |         |     |     |              |     |     |
|-----------------------------------------------------|-----------------|-----|-----|---------|-----|-----|--------------|-----|-----|
|                                                     | Toluidine       |     |     | Cresols |     |     | Nitrobenzene |     |     |
|                                                     | o-              | m-  | p-  | o-      | m-  | p-  | o-           | m-  | p-  |
| 5 <sup>b</sup>                                      | 1.8             | 0.5 | 0.2 | 1.6     | 0.7 | 0.5 | 0.3          | 0.1 | --  |
| 10 <sup>b</sup>                                     | 2.3             | 0.7 | 0.4 | 2.1     | 0.8 | 0.4 | 0.7          | 0.2 | 0.1 |
| 15 <sup>b</sup>                                     | 1.7             | 0.7 | 0.5 | 1.7     | 0.7 | 0.5 | 0.6          | 0.2 | 0.1 |
| 20 <sup>b</sup>                                     | 1.6             | 0.7 | 0.3 | 1.7     | 0.6 | 0.3 | 0.2          | --  | --  |

<sup>a</sup> Reaction conditions: Catalyst 2.5Cu/TS-1 0.15 g; Toluene 4.7 mmol ; NH<sub>3</sub>·H<sub>2</sub>O (43.71 mmol , 87.4 mmol ,131.1 mmol , 174.8 mmol) ; H<sub>2</sub>O<sub>2</sub> 14.7 mmol ; H<sub>2</sub>O 25 mL ; 353 K.

<sup>b</sup> The reaction time were 315min, 365min, 415min and 465min, respectively.

**Table S6** Effect of H<sub>2</sub>O dosage on catalytic reaction of toluene.<sup>a</sup>

| H <sub>2</sub> O<br>Dosage<br>(mL) <sup>b</sup> | Molar Yield (%) |     |     |         |     |     |              |     |     |
|-------------------------------------------------|-----------------|-----|-----|---------|-----|-----|--------------|-----|-----|
|                                                 | Toluidine       |     |     | Cresols |     |     | Nitrobenzene |     |     |
|                                                 | o-              | m-  | p-  | o-      | m-  | p-  | o-           | m-  | p-  |
| 10 <sup>c</sup>                                 | 0.3             | 0.2 | --  | 1.4     | 0.5 | 0.2 | 1.0          | 0.6 | 0.3 |
| 15 <sup>c</sup>                                 | 0.7             | 0.4 | 0.1 | 1.4     | 0.7 | 0.4 | 0.8          | 0.4 | 0.2 |
| 20 <sup>c</sup>                                 | 1.4             | 0.9 | 0.4 | 1.7     | 0.9 | 0.5 | 0.6          | 0.4 | 0.2 |
| 25 <sup>c</sup>                                 | 2.3             | 0.7 | 0.4 | 2.1     | 0.8 | 0.4 | 0.7          | 0.2 | 0.1 |
| 30 <sup>c</sup>                                 | 2.2             | 0.7 | 0.4 | 1.7     | 0.8 | 0.5 | 0.6          | 0.3 | 0.1 |

<sup>a</sup> Reaction conditions: Catalyst 2.5Cu/TS-1 0.15 g; Toluene 4.7 mmol ; NH<sub>3</sub>·H<sub>2</sub>O 87.4 mmol ; H<sub>2</sub>O<sub>2</sub> 14.7 mmol ; 353 K.

<sup>b</sup> The molar concentrations of NH<sub>3</sub>·H<sub>2</sub>O were 4.1 mol/L, 3.3 mol/L, 2.8 mol/L, 2.4 mol/L and 2.1 mol/L, successively. The molar concentrations of H<sub>2</sub>O<sub>2</sub> were 0.7 mol/L, 0.6 mol/L, 0.5 mol/L, 0.4 mol/L and 0.4 mol/L, successively. The pH values of these mixtures containing NH<sub>3</sub>·H<sub>2</sub>O, H<sub>2</sub>O<sub>2</sub> and H<sub>2</sub>O were 10.65, 10.27, 9.72, 9.24 and 8.87, successively.

<sup>c</sup> The reaction time were 215min, 265min, 315min, 365min and 415min, respectively.
